# Supplementary material for: Predicting CTCF’s cell type-specific binding sites in human genome
Source: Research Square preprint supplement (doi:10.21203/rs.3.rs-5042361/v1), 2024-11-07
Supplement: Supplementary file 1 [file 6f6ecae041c01590cb175c79.xlsx]

## Sheet: Table S1
Statistics of epigenetic signal data. (The cell lines in blue font in the table are the epigentic data used in this paper.)
Feature		Cell lines	Number
DNase-seq		A549,AG04449,AG04450,AG09309,AG09319,AG10803,AoAF,BE2_C,BJ,Caco2,Fibrobl,Gliobla,GM06990,GM12864,GM12865,GM12878,GM12891,GM12892,GM19238,GM19239,GM19240,Hac,HBMEC,HCFaa,HCM,HCPEpiC,HEEpiC,HepG2,HFF,HMEC,HMF,HPF,HRE,HRPEpiC,HSMM,HSMMtube,HUVEC,HVMF,K562,NB4,NHEK,NHLF,Osteobl,ProgFib,RPTEC,SAEC,SK-N-SH_RA,WERI-Rb-1,WI-38,HA-sp,HCT-116,HFF-Myc,H1-hESC, HeLa-S3, HL-60, MCF-7, NH-A,NHDF-Ad,NHDF-neo	59
HM	H2AFZ	GM12878,HepG2,HMEC,HSMM,HSMMtube,HUVEC,K562,NHEK,NHLF,Osteobl,H1-hESC,HeLa-S3,NH-A,NHDF-Ad	14
	H3K27ac	AG04450,GM12878,HepG2,HMEC,HSMM,HSMMtube,HUVEC,K562,NHLF,NHEK,Osteobl,MCF-7,NHDF-Ad,H1-hESC,HCT-116,HeLa-S3,NH-A	17
	H3K27me3	AG04450,BJ,GM06990,GM12878,HepG2,HMEC,HRE,HSMM,HSMMtube,HUVEC,K562,NHEK,NHLF,Osteobl,SAEC,Caco-2,H1-hESC,HeLa-S3,SK-N-SH_RA,MCF-7,NH-A,NHDF-Ad	22
	H3K36me3	BJ,GM06990,GM12878,HepG2,HMEC,HRE,HSMM,HSMMtube,HUVEC,K562,NHEK,NHLF,Osteobl,SAEC,Caco-2,H1-hESC,HeLa-S3,NHDF-Ad,SK-N-SH_RA,MCF-7,NH-A	21
	H3K4me1	GM12878,HepG2,HMEC,HSMM,HSMMtube,HUVEC,K562,NHEK,NHLF,Osteobl,H1-hESC,HeLa-S3,NH-A,NHDF-Ad	14
	H3K4me2	GM12878,HepG2,HMEC,HSMM,HSMMtube,HUVEC,K562,NHEK,NHLF,Osteobl,H1-hESC,HeLa-S3,NHDF-Ad,NH-A	14
	H3K4me3	AG04449,AG04450,AG09309,AG09319,AG10803,AoAF,BE2_C,BJ,GM06990,GM12864,GM12865,GM12878,HAc,HBMEC,HCFaa,HCM,HCPEpiC,HEEpiC,HepG2,HMEC,HMF,HPF,HRE,HRPEpiC,HSMM,HSMMtube,HUVEC,HVMF,K562,NB4,NHEK,NHLF,Osteobl,RPTEC,SAEC,NHDF-Ad,Caco-2,NHDF-neo,H1-hESC,HA-sp,HCT-116,HeLa-S3,MCF-7,NH-A,WERI-Rb-1,SK-N-SH_RA	46
	H3K79me2	GM12878,HepG2,HMEC,HSMM,HSMMtube,HUVEC,K562,NHEK,NHLF,Osteobl,H1-hESC,HeLa-S3,NH-A,NHDF-Ad	14
	H3K9ac	GM12878,HepG2,HMEC,HSMM,HSMMtube,HUVEC,K562,NHEK,NHLF,H1-hESC,HeLa-S3,NH-A,NHDF-Ad	13
	H3K9me1	HUVEC,K562,NHEK	3
	H3K9me3	AG04450,GM12878,HepG2,HMEC,HSMM,HSMMtube,HUVEC,K562,NHEK,NHLF,Osteobl,H1-hESC,HeLa-S3,MCF-7,NH-A,NHDF-Ad	16
	H4K20me1	GM12878,HepG2,HMEC,HSMM,HSMMtube,HUVEC,K562,NHEK,NHLF,Osteobl,H1-hESC,HeLa-S3,NH-A,NHDF-Ad	14
TFs	RAD21	A549,GM12878,HepG2,K562,IMR90,MCF-7,SK-N-SH_RA,ECC-1, SK-N-SH, H1-hESC, HCT-116,HeLa-S3	12
	SMC3	GM12878,HepG2,K562,SK-N-SH,HeLa-S3	5

## Sheet: Table S2
Data statistics and sources of 67 cell lines.
No.	Cell lines	Peak number with ChrX and ChrY	Peak number without ChrX and ChrY	Download link
12	A549	45732	44220	http://hgdownload.soe.ucsc.edu/goldenPath/hg19/encodeDCC/wgEncodeAwgTfbsUniform/wgEncodeAwgTfbsUwA549CtcfUniPk.narrowPeak.gz
13	AG04449	50260	48846	http://hgdownload.soe.ucsc.edu/goldenPath/hg19/encodeDCC/wgEncodeAwgTfbsUniform/wgEncodeAwgTfbsUwAg04449CtcfUniPk.narrowPeak.gz
14	AG04450	46500	45166	http://hgdownload.soe.ucsc.edu/goldenPath/hg19/encodeDCC/wgEncodeAwgTfbsUniform/wgEncodeAwgTfbsUwAg04450CtcfUniPk.narrowPeak.gz
15	AG09309	43928	42484	http://hgdownload.soe.ucsc.edu/goldenPath/hg19/encodeDCC/wgEncodeAwgTfbsUniform/wgEncodeAwgTfbsUwAg09309CtcfUniPk.narrowPeak.gz
16	AG09319	49675	48082	http://hgdownload.soe.ucsc.edu/goldenPath/hg19/encodeDCC/wgEncodeAwgTfbsUniform/wgEncodeAwgTfbsUwAg09319CtcfUniPk.narrowPeak.gz
17	AG10803	47656	46206	http://hgdownload.soe.ucsc.edu/goldenPath/hg19/encodeDCC/wgEncodeAwgTfbsUniform/wgEncodeAwgTfbsUwAg10803CtcfUniPk.narrowPeak.gz
44	AoAF	45960	44482	http://hgdownload.soe.ucsc.edu/goldenPath/hg19/encodeDCC/wgEncodeAwgTfbsUniform/wgEncodeAwgTfbsUwAoafCtcfUniPk.narrowPeak.gz
18	BE2_C	54655	53105	http://hgdownload.soe.ucsc.edu/goldenPath/hg19/encodeDCC/wgEncodeAwgTfbsUniform/wgEncodeAwgTfbsUwBe2cCtcfUniPk.narrowPeak.gz
19	BJ	44668	43408	http://hgdownload.soe.ucsc.edu/goldenPath/hg19/encodeDCC/wgEncodeAwgTfbsUniform/wgEncodeAwgTfbsUwBjCtcfUniPk.narrowPeak.gz
20	Caco-2	46852	45557	http://hgdownload.soe.ucsc.edu/goldenPath/hg19/encodeDCC/wgEncodeAwgTfbsUniform/wgEncodeAwgTfbsUwCaco2CtcfUniPk.narrowPeak.gz
40	Dnd41	50070	48481	http://hgdownload.soe.ucsc.edu/goldenPath/hg19/encodeDCC/wgEncodeAwgTfbsUniform/wgEncodeAwgTfbsBroadDnd41CtcfUniPk.narrowPeak.gz
5	Fibrobl	45978	44557	http://hgdownload.soe.ucsc.edu/goldenPath/hg19/encodeDCC/wgEncodeAwgTfbsUniform/wgEncodeAwgTfbsUtaFibroblCtcfUniPk.narrowPeak.gz
42	Gliobla	62772	60862	http://hgdownload.soe.ucsc.edu/goldenPath/hg19/encodeDCC/wgEncodeAwgTfbsUniform/wgEncodeAwgTfbsUtaGlioblaCtcfUniPk.narrowPeak.gz
21	GM06990	45500	43945	http://hgdownload.soe.ucsc.edu/goldenPath/hg19/encodeDCC/wgEncodeAwgTfbsUniform/wgEncodeAwgTfbsUwGm06990CtcfUniPk.narrowPeak.gz
45	GM12801	2883	2878	http://hgdownload.soe.ucsc.edu/goldenPath/hg19/encodeDCC/wgEncodeAwgTfbsUniform/wgEncodeAwgTfbsUwGm12801CtcfUniPk.narrowPeak.gz
46	GM12864	46798	45412	http://hgdownload.soe.ucsc.edu/goldenPath/hg19/encodeDCC/wgEncodeAwgTfbsUniform/wgEncodeAwgTfbsUwGm12864CtcfUniPk.narrowPeak.gz
47	GM12865	44069	42782	http://hgdownload.soe.ucsc.edu/goldenPath/hg19/encodeDCC/wgEncodeAwgTfbsUniform/wgEncodeAwgTfbsUwGm12865CtcfUniPk.narrowPeak.gz
48	GM12872	47151	45723	http://hgdownload.soe.ucsc.edu/goldenPath/hg19/encodeDCC/wgEncodeAwgTfbsUniform/wgEncodeAwgTfbsUwGm12872CtcfUniPk.narrowPeak.gz
49	GM12873	51005	49204	http://hgdownload.soe.ucsc.edu/goldenPath/hg19/encodeDCC/wgEncodeAwgTfbsUniform/wgEncodeAwgTfbsUwGm12873CtcfUniPk.narrowPeak.gz
50	GM12874	37517	36457	http://hgdownload.soe.ucsc.edu/goldenPath/hg19/encodeDCC/wgEncodeAwgTfbsUniform/wgEncodeAwgTfbsUwGm12874CtcfUniPk.narrowPeak.gz
51	GM12875	39184	37822	http://hgdownload.soe.ucsc.edu/goldenPath/hg19/encodeDCC/wgEncodeAwgTfbsUniform/wgEncodeAwgTfbsUwGm12875CtcfUniPk.narrowPeak.gz
22	GM12878	40122	38759	http://hgdownload.soe.ucsc.edu/goldenPath/hg19/encodeDCC/wgEncodeAwgTfbsUniform/wgEncodeAwgTfbsUwGm12878CtcfUniPk.narrowPeak.gz
6	GM12891	42632	41643	http://hgdownload.soe.ucsc.edu/goldenPath/hg19/encodeDCC/wgEncodeAwgTfbsUniform/wgEncodeAwgTfbsUtaGm12891CtcfUniPk.narrowPeak.gz
7	GM12892	48306	46852	http://hgdownload.soe.ucsc.edu/goldenPath/hg19/encodeDCC/wgEncodeAwgTfbsUniform/wgEncodeAwgTfbsUtaGm12892CtcfUniPk.narrowPeak.gz
43	GM19238	49938	48428	http://hgdownload.soe.ucsc.edu/goldenPath/hg19/encodeDCC/wgEncodeAwgTfbsUniform/wgEncodeAwgTfbsUtaGm19238CtcfUniPk.narrowPeak.gz
8	GM19239	41085	40082	http://hgdownload.soe.ucsc.edu/goldenPath/hg19/encodeDCC/wgEncodeAwgTfbsUniform/wgEncodeAwgTfbsUtaGm19239CtcfUniPk.narrowPeak.gz
9	GM19240	46036	44650	http://hgdownload.soe.ucsc.edu/goldenPath/hg19/encodeDCC/wgEncodeAwgTfbsUniform/wgEncodeAwgTfbsUtaGm19240CtcfUniPk.narrowPeak.gz
10	H1-hESC	43247	42252	http://hgdownload.soe.ucsc.edu/goldenPath/hg19/encodeDCC/wgEncodeAwgTfbsUniform/wgEncodeAwgTfbsUtaH1hescCtcfUniPk.narrowPeak.gz
52	HAc	45591	44184	http://hgdownload.soe.ucsc.edu/goldenPath/hg19/encodeDCC/wgEncodeAwgTfbsUniform/wgEncodeAwgTfbsUwHacCtcfUniPk.narrowPeak.gz
53	HA-sp	46546	45095	http://hgdownload.soe.ucsc.edu/goldenPath/hg19/encodeDCC/wgEncodeAwgTfbsUniform/wgEncodeAwgTfbsUwHaspCtcfUniPk.narrowPeak.gz
54	HBMEC	58376	56673	http://hgdownload.soe.ucsc.edu/goldenPath/hg19/encodeDCC/wgEncodeAwgTfbsUniform/wgEncodeAwgTfbsUwHbmecCtcfUniPk.narrowPeak.gz
55	HCFaa	41571	40355	http://hgdownload.soe.ucsc.edu/goldenPath/hg19/encodeDCC/wgEncodeAwgTfbsUniform/wgEncodeAwgTfbsUwHcfaaCtcfUniPk.narrowPeak.gz
23	HCM	50703	49194	http://hgdownload.soe.ucsc.edu/goldenPath/hg19/encodeDCC/wgEncodeAwgTfbsUniform/wgEncodeAwgTfbsUwHcmCtcfUniPk.narrowPeak.gz
24	HCPEpiC	61062	59276	http://hgdownload.soe.ucsc.edu/goldenPath/hg19/encodeDCC/wgEncodeAwgTfbsUniform/wgEncodeAwgTfbsUwHcpeCtcfUniPk.narrowPeak.gz
25	HCT-116	50294	48846	http://hgdownload.soe.ucsc.edu/goldenPath/hg19/encodeDCC/wgEncodeAwgTfbsUniform/wgEncodeAwgTfbsUwHct116CtcfUniPk.narrowPeak.gz
26	HEEpiC	46226	44750	http://hgdownload.soe.ucsc.edu/goldenPath/hg19/encodeDCC/wgEncodeAwgTfbsUniform/wgEncodeAwgTfbsUwHeeCtcfUniPk.narrowPeak.gz
56	HEK293	47331	45455	http://hgdownload.soe.ucsc.edu/goldenPath/hg19/encodeDCC/wgEncodeAwgTfbsUniform/wgEncodeAwgTfbsUwHek293CtcfUniPk.narrowPeak.gz
27	HeLa-S3	38400	37124	http://hgdownload.soe.ucsc.edu/goldenPath/hg19/encodeDCC/wgEncodeAwgTfbsUniform/wgEncodeAwgTfbsUwHelas3CtcfUniPk.narrowPeak.gz
28	HepG2	48708	47522	http://hgdownload.soe.ucsc.edu/goldenPath/hg19/encodeDCC/wgEncodeAwgTfbsUniform/wgEncodeAwgTfbsUwHepg2CtcfUniPk.narrowPeak.gz
57	HFF	34889	33880	http://hgdownload.soe.ucsc.edu/goldenPath/hg19/encodeDCC/wgEncodeAwgTfbsUniform/wgEncodeAwgTfbsUwHffCtcfUniPk.narrowPeak.gz
58	HFF-Myc	43821	42620	http://hgdownload.soe.ucsc.edu/goldenPath/hg19/encodeDCC/wgEncodeAwgTfbsUniform/wgEncodeAwgTfbsUwHffmycCtcfUniPk.narrowPeak.gz
29	HL-60	16683	16464	http://hgdownload.soe.ucsc.edu/goldenPath/hg19/encodeDCC/wgEncodeAwgTfbsUniform/wgEncodeAwgTfbsUwHl60CtcfUniPk.narrowPeak.gz
30	HMEC	55897	53963	http://hgdownload.soe.ucsc.edu/goldenPath/hg19/encodeDCC/wgEncodeAwgTfbsUniform/wgEncodeAwgTfbsUwHmecCtcfUniPk.narrowPeak.gz
59	HMF	54171	52354	http://hgdownload.soe.ucsc.edu/goldenPath/hg19/encodeDCC/wgEncodeAwgTfbsUniform/wgEncodeAwgTfbsUwHmfCtcfUniPk.narrowPeak.gz
60	HPAF	56686	55020	http://hgdownload.soe.ucsc.edu/goldenPath/hg19/encodeDCC/wgEncodeAwgTfbsUniform/wgEncodeAwgTfbsUwHpafCtcfUniPk.narrowPeak.gz
61	HPF	46150	44797	http://hgdownload.soe.ucsc.edu/goldenPath/hg19/encodeDCC/wgEncodeAwgTfbsUniform/wgEncodeAwgTfbsUwHpfCtcfUniPk.narrowPeak.gz
31	HRE	42295	40990	http://hgdownload.soe.ucsc.edu/goldenPath/hg19/encodeDCC/wgEncodeAwgTfbsUniform/wgEncodeAwgTfbsUwHreCtcfUniPk.narrowPeak.gz
32	HRPEpiC	53134	51513	http://hgdownload.soe.ucsc.edu/goldenPath/hg19/encodeDCC/wgEncodeAwgTfbsUniform/wgEncodeAwgTfbsUwHrpeCtcfUniPk.narrowPeak.gz
1	HSMM	50924	49398	http://hgdownload.soe.ucsc.edu/goldenPath/hg19/encodeDCC/wgEncodeAwgTfbsUniform/wgEncodeAwgTfbsBroadHsmmCtcfUniPk.narrowPeak.gz
2	HSMMtube	47949	46524	http://hgdownload.soe.ucsc.edu/goldenPath/hg19/encodeDCC/wgEncodeAwgTfbsUniform/wgEncodeAwgTfbsBroadHsmmtCtcfUniPk.narrowPeak.gz
62	HUVEC	37920	36858	http://hgdownload.soe.ucsc.edu/goldenPath/hg19/encodeDCC/wgEncodeAwgTfbsUniform/wgEncodeAwgTfbsUwHuvecCtcfUniPk.narrowPeak.gz
63	HVMF	46460	44998	http://hgdownload.soe.ucsc.edu/goldenPath/hg19/encodeDCC/wgEncodeAwgTfbsUniform/wgEncodeAwgTfbsUwHvmfCtcfUniPk.narrowPeak.gz
33	K562	43247	41944	http://hgdownload.soe.ucsc.edu/goldenPath/hg19/encodeDCC/wgEncodeAwgTfbsUniform/wgEncodeAwgTfbsUwK562CtcfUniPk.narrowPeak.gz
34	MCF-7	58994	56898	http://hgdownload.soe.ucsc.edu/goldenPath/hg19/encodeDCC/wgEncodeAwgTfbsUniform/wgEncodeAwgTfbsUwMcf7CtcfUniPk.narrowPeak.gz
35	NB4	38253	37069	http://hgdownload.soe.ucsc.edu/goldenPath/hg19/encodeDCC/wgEncodeAwgTfbsUniform/wgEncodeAwgTfbsUwNb4CtcfUniPk.narrowPeak.gz
3	NH-A	38474	37286	http://hgdownload.soe.ucsc.edu/goldenPath/hg19/encodeDCC/wgEncodeAwgTfbsUniform/wgEncodeAwgTfbsBroadNhaCtcfUniPk.narrowPeak.gz
41	NHDF-Ad	48995	47407	http://hgdownload.soe.ucsc.edu/goldenPath/hg19/encodeDCC/wgEncodeAwgTfbsUniform/wgEncodeAwgTfbsBroadNhdfadCtcfUniPk.narrowPeak.gz
36	NHDF-neo	45920	44640	http://hgdownload.soe.ucsc.edu/goldenPath/hg19/encodeDCC/wgEncodeAwgTfbsUniform/wgEncodeAwgTfbsUwNhdfneoCtcfUniPk.narrowPeak.gz
64	NHEK	42465	41000	http://hgdownload.soe.ucsc.edu/goldenPath/hg19/encodeDCC/wgEncodeAwgTfbsUniform/wgEncodeAwgTfbsUwNhekCtcfUniPk.narrowPeak.gz
65	NHLF	35446	34410	http://hgdownload.soe.ucsc.edu/goldenPath/hg19/encodeDCC/wgEncodeAwgTfbsUniform/wgEncodeAwgTfbsUwNhlfCtcfUniPk.narrowPeak.gz
4	Osteobl	56264	54501	http://hgdownload.soe.ucsc.edu/goldenPath/hg19/encodeDCC/wgEncodeAwgTfbsUniform/wgEncodeAwgTfbsBroadOsteoblCtcfUniPk.narrowPeak.gz
11	ProgFib	43918	42681	http://hgdownload.soe.ucsc.edu/goldenPath/hg19/encodeDCC/wgEncodeAwgTfbsUniform/wgEncodeAwgTfbsUtaProgfibCtcfUniPk.narrowPeak.gz
37	RPTEC	58785	56847	http://hgdownload.soe.ucsc.edu/goldenPath/hg19/encodeDCC/wgEncodeAwgTfbsUniform/wgEncodeAwgTfbsUwRptecCtcfUniPk.narrowPeak.gz
38	SAEC	42446	41171	http://hgdownload.soe.ucsc.edu/goldenPath/hg19/encodeDCC/wgEncodeAwgTfbsUniform/wgEncodeAwgTfbsUwSaecCtcfUniPk.narrowPeak.gz
39	SK-N-SH_RA	46232	44695	http://hgdownload.soe.ucsc.edu/goldenPath/hg19/encodeDCC/wgEncodeAwgTfbsUniform/wgEncodeAwgTfbsUwSknshraCtcfUniPk.narrowPeak.gz
67	WI-38	31518	30548	http://hgdownload.soe.ucsc.edu/goldenPath/hg19/encodeDCC/wgEncodeAwgTfbsUniform/wgEncodeAwgTfbsUwWi38CtcfUniPk.narrowPeak.gz
66	WREI-Rb-1	50308	48860	http://hgdownload.soe.ucsc.edu/goldenPath/hg19/encodeDCC/wgEncodeAwgTfbsUniform/wgEncodeAwgTfbsUwWerirb1CtcfUniPk.narrowPeak.gz

## Sheet: Table S3
Positive and Negative imformation for each cell lines.
(N:peak number without chrX and chrY, N' : peak number of 19 chromsomes with out chr1,chr8 and chr21)
No.	Cell lines	Positive			Negative
		N	N'	N-N'	N	N'	N-N'
1	Hsmm	49398	41822	7576	88173	74460	13713
2	Hsmmt	46524	39359	7165	91243	77095	14148
3	Nha	37286	31509	5777	100325	84814	15511
4	Osteobl	54501	46095	8406	85662	72383	13279
5	Fibrobl	44557	37707	6850	93100	78654	14446
6	Gm12891	41643	35275	6368	96094	81158	14936
7	Gm12892	46852	39642	7210	90862	76763	14099
8	Gm19239	40082	33838	6244	97582	82531	15051
9	Gm19240	44650	37717	6933	93058	78675	14383
10	H1hesc	42252	35744	6508	95425	80640	14785
11	Progfib	42681	36061	6620	94943	80273	14670
12	A549	44220	37690	6530	93395	78643	14752
13	Ag04449	48846	41252	7594	88792	75090	13702
14	Ag04450	45166	38140	7026	92360	78116	14244
15	Ag09309	42484	35970	6514	95016	80259	14757
16	Ag09319	48082	40589	7493	89402	75622	13780
17	Ag10803	46206	39021	7185	91309	77221	14088
18	Be2c	53105	44925	8180	84485	71391	13094
19	Bj	43408	36660	6748	94095	79576	14519
20	Caco2	45557	39173	6384	91955	77076	14879
21	Gm06990	43945	37143	6802	93568	79093	14475
22	Gm12878	38759	32843	5916	98811	83438	15373
23	Hcm	49194	41584	7610	88571	74872	13699
24	Hcpe	59276	50253	9023	78250	65987	12263
25	Hct116	48846	41179	7667	88722	75105	13617
26	Hee	44750	37756	6994	92780	78488	14292
27	Helas3	37124	31067	6057	100429	85199	15230
28	Hepg2	47522	40636	6886	90034	75635	14399
29	Hl60	16464	13759	2705	121047	102472	18575
30	Hmec	53963	45623	8340	83586	70649	12937
31	Hre	40990	34674	6316	96582	81602	14980
32	Hrpe	51513	43517	7996	86037	72746	13291
33	K562	41944	34950	6994	95637	81354	14283
34	Mcf7	56898	48135	8763	80676	68162	12514
35	Nb4	37069	31743	5326	100455	84507	15948
36	Nhdfneo	44640	37708	6932	92923	78572	14351
37	Rptec	56847	48049	8798	80765	68287	12478
38	Saec	41171	34800	6371	96356	81445	14911
39	Sknshra	44695	37892	6803	92810	78334	14476
40	Dnd41	48481	40986	7495	89096	75295	13801
41	Nhdfad	47407	40106	7301	90178	76195	13983
42	Gliobla	60862	51488	9374	76740	64820	11920
43	Gm19238	48428	40931	7497	89263	75448	13815
44	Aoaf	44482	37588	6894	93099	78701	14398
45	Gm12801	2878	2388	490	134603	113820	20783
46	Gm12864	45412	38351	7061	92129	77922	14207
47	Gm12865	42782	36168	6614	94766	80102	14664
48	Gm12872	45723	38677	7046	91845	77614	14231
49	Gm12873	49204	41549	7655	88339	74721	13618
50	Gm12874	36457	30859	5598	101105	85432	15673
51	Gm12875	37822	31980	5842	99693	84258	15435
52	Hac	44184	37407	6777	93411	78898	14513
53	Hasp	45095	38214	6881	92402	78004	14398
54	Hbmec	56673	47993	8680	80845	68245	12600
55	Hcfaa	40355	34205	6150	97167	82039	15128
56	Hek293	45455	38654	6801	92130	77648	14482
57	Hff	33880	28652	5228	103653	87613	16040
58	Hffmyc	42620	35971	6649	95140	80480	14660
59	Hmf	52354	44246	8108	85199	72029	13170
60	Hpaf	55020	46528	8492	82528	69736	12792
61	Hpf	44797	37981	6816	92753	78290	14463
62	Huvec	36858	31168	5690	100683	85095	15588
63	Hvmf	44998	38095	6903	92581	78197	14384
64	Nhek	41000	34657	6343	96580	81632	14948
65	Nhlf	34410	29059	5351	103234	87300	15934
66	Werirb1	48860	41071	7789	88743	75253	13490
67	Wi38	30548	25828	4720	106995	90436	16559

## Sheet: Table S4
The prediction AUC value of single epigenomic features.
Signal type: DNase I				Signal type: HMs					Signal type: com_motif				Signal type: RAD21
Cell lines	AUC(Test set)	AUC(Independent set)		Cell lines	HMs	AUC(Test set)	AUC(Independent set)		Cell lines	AUC(Test set)	AUC(Independent set)		Cell lines	AUC(Test set)	AUC(Independent set)
A549	0.911±0.002	0.919±0.001		GM12878	H2AFZ	0.701±0.010	0.705±0.005		Ag04449	0.715±0.005	0.650±0.007		A549	0.923±0.002	0.929±0.000
AG04449	0.827±0.002	0.828±0.001			H3K4me1	0.658±0.003	0.653±0.005		AG09319	0.662±0.003	0.561±0.016		GM12878	0.931±0.001	0.935±0.000
AG04450	0.919±0.001	0.911±0.005			H3K4me2	0.630±0.002	0.623±0.002		AG10803	0.658±0.008	0.580±0.012		H1-hESC	0.889±0.001	0.893±0.000
AG09309	0.871±0.000	0.871±0.001			H3K4me3	0.618±0.002	0.615±0.007		AoAF	0.642±0.005	0.562±0.018		HCT-116	0.908±0.002	0.905±0.001
AG09319	0.871±0.001	0.873±0.002			H3K9ac	0.593±0.002	0.595±0.003		BE2_C	0.679±0.004	0.582±0.006		HeLa-S3	0.923±0.002	0.918±0.001
AG10803	0.890±0.002	0.890±0.001			H3K9me3	0.529±0.009	0.528±0.004		Caco-2	0.688±0.003	0.575±0.027		HepG2	0.915±0.002	0.922±0.000
AoAF	0.900±0.001	0.900±0.001			H3K27ac	0.575±0.003	0.569±0.010		Fibrobl	0.661±0.001	0.572±0.018		K562	0.936±0.000	0.934±0.001
BE2_C	0.914±0.000	0.917±0.000			H3K27me3	0.575±0.002	0.574±0.001		Gliobla	0.667±0.002	0.549±0.016		MCF-7	0.911±0.002	0.913±0.002
BJ	0.899±0.005	0.845±0.005			H3K36me3	0.559±0.016	0.562±0.009		GM12891	0.656±0.004	0.589±0.015		SK-N-SH_RA	0.922±0.003	0.925±0.000
Caco-2	0.696±0.002	0.707±0.002			H3K79me2	0.590±0.016	0.610±0.005		GM12892	0.648±0.001	0.564±0.019
Fibrobl	0.763±0.008	0.763±0.004			H4K20me1	0.525±0.012	0.527±0.005		GM19238	0.646±0.007	0.571±0.016		Signal type: SMC3
Gliobla	0.818±0.002	0.811±0.002		H1-hESC	H2AFZ	0.637±0.002	0.642±0.000		GM19239	0.644±0.004	0.548±0.004		Cell lines	AUC(Test set)	AUC(Independent set)
GM06990	0.772±0.003	0.770±0.005			H3K4me1	0.644±0.002	0.653±0.000		GM19240	0.655±0.005	0.559±0.015		GM12878	0.887±0.003	0.884±0.001
GM12864	0.872±0.003	0.872±0.000			H3K4me2	0.653±0.001	0.657±0.003		H1-hESC	0.660±0.004	0.558±0.007		HeLa-S3	0.923±0.000	0.918±0.000
GM12865	0.918±0.000	0.919±0.000			H3K4me3	0.590±0.010	0.600±0.002		HBMEC	0.649±0.002	0.554±0.019		HepG2	0.875±0.003	0.880±0.001
GM12878	0.865±0.002	0.874±0.000			H3K9ac	0.591±0.007	0.599±0.010		HCPEpiC	0.649±0.001	0.544±0.012		K562	0.899±0.005	0.901±0.002
GM12891	0.829±0.000	0.831±0.002			H3K9me3	0.533±0.004	0.548±0.005		HCT-116	0.684±0.002	0.571±0.007
GM12892	0.799±0.003	0.802±0.000			H3K27ac	0.538±0.009	0.546±0.005		HEEpiC	0.676±0.001	0.555±0.007		Signal type: RAD21+SMC3
GM19238	0.816±0.000	0.822±0.002			H3K27me3	0.572±0.007	0.566±0.002		HepG2	0.683±0.002	0.556±0.006		Cell lines	AUC(Test set)	AUC(Independent set)
GM19239	0.838±0.002	0.838±0.001			H3K36me3	0.533±0.012	0.539±0.005		HMEC	0.662±0.006	0.570±0.026		GM12878	0.937±0.001	0.942±0.000
GM19240	0.828±0.001	0.825±0.005			H3K79me2	0.566±0.002	0.563±0.012		HMF	0.673±0.008	0.569±0.008		HeLa-S3	0.922±0.000	0.918±0.000
H1-hESC	0.876±0.002	0.878±0.001			H4K20me1	0.521±0.002	0.557±0.006		HRPEpiC	0.676±0.002	0.569±0.018		HepG2	0.921±0.001	0.930±0.000
HAc	0.875±0.001	0.876±0.001		HeLa-S3	H2AFZ	0.660±0.003	0.656±0.006		HSMM	0.671±0.002	0.589±0.014		K562	0.947±0.000	0.944±0.000
HA-sp	0.806±0.005	0.814±0.000			H3K4me1	0.652±0.006	0.642±0.009		HSMMtube	0.678±0.004	0.576±0.019
HBMEC	0.844±0.003	0.845±0.001			H3K4me2	0.657±0.007	0.656±0.002		K562	0.691±0.003	0.554±0.016
HCFaa	0.889±0.002	0.892±0.000			H3K4me3	0.604±0.009	0.593±0.002		MCF-7	0.691±0.002	0.585±0.021
HCM	0.897±0.002	0.896±0.002			H3K9ac	0.586±0.005	0.578±0.004		NHDF-Ad	0.676±0.002	0.561±0.014
HCPEpiC	0.875±0.002	0.875±0.000			H3K9me3	0.559±0.004	0.574±0.001		NHDF-neo	0.666±0.004	0.546±0.008
HCT-116	0.919±0.001	0.919±0.000			H3K27ac	0.586±0.006	0.583±0.001		Osteobl	0.653±0.007	0.536±0.013
HEEpiC	0.913±0.002	0.913±0.000			H3K27me3	0.569±0.001	0.571±0.006		ProgFib	0.671±0.002	0.563±0.012
HeLa-S3	0.877±0.001	0.875±0.001			H3K36me3	0.544±0.011	0.546±0.009		RPTEC	0.693±0.002	0.568±0.007
HepG2	0.789±0.002	0.798±0.002			H3K79me2	0.536±0.012	0.523±0.002		SK-N-SH_RA	0.677±0.001	0.557±0.022
HFF	0.941±0.001	0.944±0.000			H4K20me1	0.515±0.004	0.517±0.013		WERI-Rb-1	0.686±0.003	0.559±0.004
HFF-Myc	0.878±0.003	0.876±0.001		HepG2	H2AFZ	0.614±0.000	0.606±0.001
HL-60	0.939±0.002	0.945±0.000			H3K4me1	0.675±0.004	0.671±0.008		Signal type: uni_motif
HMEC	0.826±0.002	0.818±0.001			H3K4me2	0.667±0.003	0.663±0.001		Cell lines	AUC(Test set)	AUC(Independent set)
HMF	0.884±0.001	0.883±0.000			H3K4me3	0.594±0.005	0.589±0.013		Ag04449	0.535±0.004	0.513±0.001
HPF	0.895±0.002	0.893±0.000			H3K9ac	0.607±0.003	0.587±0.013		AG09319	0.637±0.008	0.555±0.017
HRE	0.859±0.001	0.862±0.002			H3K9me3	0.541±0.005	0.552±0.012		AG10803	0.636±0.003	0.559±0.012
HRPEpiC	0.872±0.002	0.873±0.000			H3K27ac	0.579±0.003	0.568±0.003		AoAF	0.576±0.008	0.545±0.010
HSMM	0.879±0.002	0.844±0.001			H3K27me3	0.578±0.005	0.589±0.006		BE2_C	0.665±0.000	0.583±0.006
HSMMtube	0.948±0.000	0.910±0.000			H3K36me3	0.545±0.013	0.541±0.007		Caco-2	0.661±0.007	0.558±0.005
HUVEC	0.904±0.001	0.902±0.001			H3K79me2	0.579±0.002	0.577±0.004		Fibrobl	0.545±0.005	0.528±0.001
HVMF	0.857±0.002	0.857±0.001			H4K20me1	0.558±0.010	0.557±0.002		Gliobla	0.571±0.004	0.533±0.007
K562	0.871±0.000	0.860±0.000		HMEC	H2AFZ	0.637±0.003	0.628±0.002		GM12891	0.564±0.010	0.544±0.003
MCF-7	0.931±0.001	0.934±0.000			H3K4me1	0.615±0.007	0.618±0.003		GM12892	0.629±0.004	0.690±0.018
NB4	0.923±0.003	0.928±0.000			H3K4me2	0.654±0.004	0.646±0.001		GM19238	0.545±0.004	0.551±0.006
NH-A	0.833±0.001	0.831±0.000			H3K4me3	0.581±0.008	0.579±0.003		GM19239	0.526±0.005	0.516±0.002
NHDF-Ad	0.875±0.000	0.876±0.000			H3K9ac	0.551±0.010	0.581±0.007		GM19240	0.529±0.001	0.518±0.007
NHDF-neo	0.886±0.000	0.889±0.000			H3K9me3	0.573±0.002	0.570±0.004		H1-hESC	0.717±0.004	0.585±0.001
NHEK	0.834±0.001	0.838±0.001			H3K27ac	0.61±0.002	0.603±0.007		HBMEC	0.610±0.004	0.532±0.005
NHLF	0.856±0.001	0.856±0.002			H3K27me3	0.538±0.005	0.534±0.005		HCPEpiC	0.609±0.004	0.534±0.012
Osteobl	0.758±0.005	0.767±0.001			H3K36me3	0.545±0.006	0.553±0.004		HCT-116	0.652±0.006	0.568±0.006
ProgFib	0.834±0.006	0.832±0.001			H3K79me2	0.551±0.008	0.554±0.005		HEEpiC	0.594±0.002	0.558±0.006
RPTEC	0.841±0.001	0.836±0.003			H4K20me1	0.548±0.002	0.553±0.004		HepG2	0.614±0.005	0.529±0.006
SAEC	0.921±0.001	0.908±0.001		HSMM	H2AFZ	0.601±0.001	0.609±0.001		HMEC	0.633±0.008	0.550±0.009
SK-N-SH_RA	0.858±0.002	0.855±0.001			H3K4me1	0.656±0.004	0.644±0.009		HMF	0.779±0.003	0.551±0.005
WERI-Rb-1	0.868±0.000	0.869±0.001			H3K4me2	0.646±0.001	0.640±0.002		HRPEpiC	0.661±0.003	0.550±0.007
WI-38	0.831±0.002	0.827±0.002			H3K4me3	0.582±0.003	0.585±0.001		HSMM	0.646±0.003	0.565±0.008
					H3K9ac	0.574±0.005	0.591±0.011		HSMMtube	0.636±0.004	0.547±0.004
					H3K9me3	0.530±0.006	0.550±0.005		K562	0.638±0.003	0.521±0.014
					H3K27ac	0.582±0.014	0.572±0.006		MCF-7	0.681±0.005	0.581±0.012
					H3K27me3	0.549±0.012	0.557±0.004		NHDF-Ad	0.615±0.005	0.553±0.004
					H3K36me3	0.573±0.005	0.565±0.003		NHDF-neo	0.632±0.005	0.561±0.007
					H3K79me2	0.558±0.002	0.556±0.005		Osteobl	0.620±0.003	0.533±0.012
					H4K20me1	0.539±0.008	0.538±0.011		ProgFib	0.552±0.001	0.520±0.005
				HSMMtube	H2AFZ	0.631±0.001	0.631±0.003		RPTEC	0.681±0.003	0.563±0.020
					H3K4me1	0.599±0.004	0.597±0.008		SK-N-SH_RA	0.602±0.008	0.545±0.003
					H3K4me2	0.614±0.002	0.616±0.001		WERI-Rb-1	0.659±0.004	0.559±0.010
					H3K4me3	0.575±0.003	0.571±0.007
					H3K9ac	0.608±0.004	0.610±0.004
					H3K9me3	0.532±0.002	0.549±0.011
					H3K27ac	0.572±0.011	0.571±0.003
					H3K27me3	0.578±0.007	0.578±0.006
					H3K36me3	0.529±0.002	0.540±0.003
					H3K79me2	0.569±0.005	0.562±0.002
					H4K20me1	0.534±0.001	0.542±0.007
				HUVEC	H2AFZ	0.726±0.004	0.726±0.002
					H3K4me1	0.696±0.005	0.690±0.001
					H3K4me2	0.687±0.002	0.674±0.008
					H3K4me3	0.585±0.001	0.572±0.007
					H3K9ac	0.665±0.004	0.656±0.003
					H3K9me1	0.537±0.002	0.534±0.005
					H3K9me3	0.578±0.006	0.574±0.008
					H3K27ac	0.616±0.006	0.622±0.002
					H3K27me3	0.560±0.009	0.564±0.004
					H3K36me3	0.540±0.006	0.549±0.010
					H3K79me2	0.591±0.006	0.591±0.004
					H4K20me1	0.539±0.008	0.529±0.007
				K562	H2AFZ	0.727±0.002	0.717±0.001
					H3K4me1	0.670±0.003	0.661±0.003
					H3K4me2	0.634±0.006	0.637±0.004
					H3K4me3	0.582±0.003	0.571±0.003
					H3K9ac	0.625±0.005	0.621±0.002
					H3K9me1	0.641±0.004	0.644±0.007
					H3K9me3	0.554±0.018	0.558±0.012
					H3K27ac	0.604±0.011	0.604±0.002
					H3K27me3	0.579±0.002	0.574±0.012
					H3K36me3	0.563±0.007	0.573±0.009
					H3K79me2	0.627±0.017	0.622±0.010
					H4K20me1	0.578±0.007	0.576±0.006
				NH-A	H2AFZ	0.657±0.005	0.660±0.002
					H3K4me1	0.667±0.004	0.653±0.007
					H3K4me2	0.675±0.000	0.673±0.002
					H3K4me3	0.578±0.002	0.568±0.002
					H3K9ac	0.677±0.003	0.684±0.003
					H3K9me3	0.541±0.017	0.540±0.007
					H3K27ac	0.595±0.008	0.606±0.005
					H3K27me3	0.553±0.006	0.552±0.002
					H3K36me3	0.537±0.003	0.536±0.008
					H3K79me2	0.560±0.008	0.553±0.013
					H4K20me1	0.604±0.001	0.606±0.009
				NHDF-Ad	H2AFZ	0.644±0.002	0.645±0.003
					H3K4me1	0.675±0.004	0.673±0.003
					H3K4me2	0.655±0.003	0.654±0.003
					H3K4me3	0.603±0.003	0.604±0.004
					H3K9ac	0.613±0.007	0.619±0.006
					H3K9me3	0.537±0.003	0.518±0.005
					H3K27ac	0.621±0.004	0.619±0.005
					H3K27me3	0.561±0.004	0.554±0.007
					H3K36me3	0.559±0.004	0.557±0.008
					H3K79me2	0.561±0.007	0.577±0.003
					H4K20me1	0.563±0.008	0.556±0.014
				NHEK	H2AFZ	0.662±0.002	0.662±0.001
					H3K4me1	0.653±0.003	0.651±0.002
					H3K4me2	0.647±0.001	0.637±0.004
					H3K4me3	0.590±0.005	0.591±0.003
					H3K9ac	0.602±0.000	0.607±0.002
					H3K9me1	0.528±0.003	0.538±0.009
					H3K9me3	0.563±0.012	0.545±0.002
					H3K27ac	0.589±0.007	0.591±0.003
					H3K27me3	0.531±0.009	0.531±0.008
					H3K36me3	0.537±0.002	0.536±0.009
					H3K79me2	0.571±0.004	0.570±0.012
					H4K20me1	0.539±0.006	0.541±0.017
				NHLF	H2AFZ	0.717±0.002	0.715±0.005
					H3K4me1	0.670±0.001	0.652±0.007
					H3K4me2	0.662±0.004	0.671±0.001
					H3K4me3	0.591±0.002	0.592±0.003
					H3K9ac	0.595±0.005	0.599±0.002
					H3K9me3	0.572±0.015	0.577±0.018
					H3K27ac	0.592±0.014	0.586±0.006
					H3K27me3	0.558±0.004	0.567±0.006
					H3K36me3	0.541±0.009	0.548±0.007
					H3K79me2	0.585±0.006	0.593±0.007
					H4K20me1	0.545±0.006	0.547±0.009

## Sheet: Table S5
The prediction AUC value of combined epigenomic features.
Signal type: DNase I + HM
Cell Line	HM	CNN		SVM
		Test set	Independent set	Test set	Independent set
GM12878	H2AFZ	0.870±0.002	0.876±0.002	0.818±0.003	0.828±0.000
H1-hESC	H3K4me2	0.876±0.002	0.879±0.001	0.853±0.003	0.856±0.000
HeLa-S3	H2AFZ	0.879±0.003	0.877±0.000	0.832±0.002	0.827±0.001
HepG2	H3K4me1	0.795±0.005	0.803±0.004	0.716±0.003	0.719±0.001
HMEC	H3K4me2	0.829±0.001	0.820±0.000	0.781±0.002	0.776±0.001
HSMM	H3K4me1	0.878±0.000	0.844±0.002	0.825±0.002	0.806±0.000
HSMMtube	H2AFZ	0.949±0.001	0.911±0.001	0.904±0.002	0.871±0.000
HUVEC	H2AFZ	0.911±0.001	0.911±0.001	0.878±0.001	0.877±0.001
K562	H2AFZ	0.873±0.004	0.863±0.001	0.830±0.004	0.822±0.001
NH-A	H3K9ac	0.834±0.001	0.833±0.000	0.717±0.001	0.715±0.002
NHDF-Ad	H3K4me1	0.873±0.002	0.876±0.002	0.807±0.002	0.806±0.001
NHEK	H2AFZ	0.837±0.001	0.838±0.002	0.799±0.001	0.802±0.001
NHLF	H2AFZ	0.864±0.002	0.866±0.002	0.763±0.001	0.759±0.001
Signal type: DNase I + TF/HM
Cell Line	TF/HM	CNN		SVM
		Test set	Independent set	Test set	Independent set
A549	RAD21	0.940±0.001	0.945±0.001	0.925±0.001	0.931±0.000
H1-hESC		0.922±0.001	0.924±0.000	0.879±0.000	0.880±0.000
HCT116		0.935±0.001	0.931±0.002	0.914±0.001	0.912±0.000
MCF-7		0.945±0.001	0.947±0.000	0.920±0.002	0.924±0.001
SK-N-SH_RA		0.939±0.002	0.941±0.001	0.928±0.002	0.929±0.000
GM12878	RAD21	0.939±0.000	0.944±0.001	0.927±0.001	0.930±0.001
	SMC3	0.916±0.002	0.924±0.000	0.889±0.002	0.894±0.000
	2TFs	0.943±0.000	0.948±0.001	0.929±0.002	0.933±0.000
	2TFs, H2AFZ	0.943±0.001	0.946±0.002	0.930±0.001	0.933±0.000
HeLa-S3	RAD21	0.929±0.003	0.923±0.002	0.915±0.001	0.909±0.000
	SMC3	0.929±0.000	0.924±0.000	0.914±0.002	0.909±0.000
	2TFs	0.928±0.001	0.924±0.000	0.915±0.000	0.908±0.001
	2TFs, H2AFZ	0.930±0.002	0.925±0.000	0.914±0.002	0.909±0.000
HepG2	RAD21	0.919±0.000	0.924±0.004	0.913±0.001	0.922±0.000
	SMC3	0.889±0.002	0.899±0.000	0.880±0.002	0.888±0.000
	2TFs	0.925±0.000	0.932±0.001	0.916±0.002	0.923±0.000
	2TFs, H2AFZ	0.918±0.004	0.932±0.002	0.916±0.001	0.923±0.000
K562	RAD21	0.942±0.002	0.937±0.000	0.935±0.001	0.932±0.000
	SMC3	0.930±0.000	0.924±0.000	0.916±0.001	0.910±0.001
	2TFs	0.946±0.002	0.943±0.002	0.943±0.000	0.940±0.000
	2TFs, H2AFZ	0.948±0.003	0.943±0.001	0.942±0.002	0.939±0.001

## Sheet: Table S6
The prediction AUC value of CNN and XGBoost.
Cell line	Signal type	CNN		XGBoost
		Test set	Independent set	Test set	Independent set
Caco-2	DNase I	0.696±0.002	0.707±0.002	0.711±0.003	0.713±0.000
HL-60		0.939±0.002	0.945±0.000	0.878±0.001	0.880±0.001
HSMMtube		0.948±0.000	0.910±0.000	0.962±0.001	0.913±0.001
HepG2	SMC3	0.875±0.003	0.880±0.001	0.883±0.001	0.891±0.000
A549	RAD21	0.923±0.002	0.929±0.000	0.924±0.002	0.930±0.000
K562	RAD21+SMC3	0.947±0.000	0.944±0.000	0.948±0.000	0.945±0.000
HepG2	DNase-I+SMC3	0.889±0.002	0.899±0.000	0.905±0.017	0.903±0.000
HeLa-S3	Dnase-I+SMC3	0.929±0.000	0.924±0.000	0.933±0.001	0.928±0.000
K562	Dnase-I+RAD21+SMC3	0.946±0.002	0.943±0.002	0.951±0.000	0.947±0.000
NH-A	H3K36me3	0.537±0.003	0.536±0.008	0.542±0.003	0.544±0.001
HUVEC	H2AFZ	0.726±0.004	0.726±0.002	0.734±0.002	0.731±0.000
K562	H3K27ac	0.604±0.011	0.604±0.002	0.616±0.003	0.609±0.001
GM19240	uni_motif	0.529±0.001	0.518±0.007	0.534±0.002	0.515±0.007
HMF	uni_motif	0.779±0.003	0.551±0.005	0.776±0.001	0.554±0.001
AG10803	com_motif	0.658±0.008	0.580±0.012	0.673±0.004	0.555±0.001
HepG2	DNase I+H3K4me1	0.795±0.005	0.803±0.004	0.808±0.002	0.817±0.001
HSMMtube	DNase I+H2AFZ	0.949±0.001	0.911±0.001	0.964±0.001	0.913±0.000
GM12878	DNase I+H2AFZ	0.870±0.002	0.876±0.002	0.872±0.001	0.880±0.000
HepG2	DNase I+H3K4me1+2TFs	0.918±0.004	0.932±0.002	0.927±0.001	0.935±0.000
K562	DNase I+H2AFZ+2TFs	0.948±0.003	0.943±0.001	0.951±0.001	0.947±0.000
GM12878	DNase I+H2AFZ+2TFs	0.943±0.001	0.946±0.002	0.947±0.001	0.951±0.000
Cross cell type predictions.
Training cell line	Testing cell line	Signal type	CNN		XGBoost
			Test set	Independent set	Test set	Independent set
HSMMtube	HFF	DNase I	0.885±0.000	0.890±0.007	0.889±0.001	0.888±0.001
	HFF-myc		0.845±0.002	0.836±0.004	0.839±0.003	0.835±0.001
	Caco2		0.640±0.011	0.654±0.003	0.644±0.004	0.650±0.001
K562	GM12878	RAD21	0.925±0.002	0.929±0.001	0.925±0.002	0.928±0.001
	H1-hESC		0.804±0.014	0.813±0.010	0.778±0.011	0.774±0.012
	SK-N-SH_RA		0.888±0.010	0.899±0.002	0.887±0.007	0.889±0.005
HeLa-S3	GM12878	SMC3	0.867±0.004	0.872±0.010	0.876±0.001	0.881±0.001
	HepG2		0.873±0.002	0.881±0.002	0.872±0.002	0.881±0.000
	K562		0.911±0.003	0.909±0.002	0.911±0.002	0.908±0.000
K562	GM12878	2TFs	0.933±0.001	0.938±0.001	0.935±0.001	0.938±0.000
	HeLa-S3		0.915±0.003	0.907±0.002	0.907±0.006	0.900±0.006
	HepG2		0.917±0.002	0.927±0.001	0.918±0.002	0.927±0.000
HSMMtube	NHEK	DNase I+H2AFZ	0.808±0.001	0.810±0.001	0.812±0.001	0.816±0.000
	K562		0.849±0.003	0.834±0.001	0.850±0.003	0.843±0.000
	HUVEC		0.862±0.012	0.870±0.005	0.884±0.002	0.885±0.000
K562	GM12878	DNase I+2TFs	0.940±0.002	0.942±0.001	0.940±0.001	0.943±0.001
	HeLa-S3		0.920±0.004	0.917±0.002	0.912±0.004	0.904±0.004
	HepG2		0.920±0.002	0.930±0.001	0.920±0.003	0.929±0.001
